# Supplementary material for: A Comparative Analysis of COVID-19 Vaccines Based on over 580,000 Cases from the Vaccination Adverse Event Reporting System
Source: MDPI journal article supplement (doi:10.3390/vaccines10030408), 2022-03-08
Supplement: s1 [file s1]

Supplementary Materials File S1:

Cerebral thrombosis (CVST):

| Manufacturer    | Overall OR | OR Women | OR Women < 50 | OR Men |
|-----------------|------------|----------|---------------|--------|
| J & J           | 11.2       | 14.6     | 16.5          | 7.8    |
| Pfizer/BioNTech | 0.8        | 0.96     | 0.6           | 0.6    |
| Moderna         | 0.8        | 0.7      | 0.94          | 0.85   |

  

| Manufacturer    | Overall Cases | Cases Women | Cases Women < 50 | Cases Men |
|-----------------|---------------|-------------|------------------|-----------|
| J & J           | 46            | 30          | 17               | 16        |
| Pfizer/BioNTech | 48            | 29          | 9                | 18        |
| Moderna         | 37            | 17          | 11               | 20        |

Thrombosis:

| Manufacturer    | Overall OR | OR Women | OR Women < 50 | OR Men |
|-----------------|------------|----------|---------------|--------|
| J & J           | 1.6        | 2        | 1.9           | 1.3    |
| Pfizer/BioNTech | 0.2        | 0.3      | 0.2           | 0.2    |
| Moderna         | 0.2        | 0.3      | 0.2           | 0.2    |

  

| Manufacturer    | Overall Cases | Cases Women | Cases Women < 50 | Cases Men |
|-----------------|---------------|-------------|------------------|-----------|
| J & J           | 830           | 510         | 238              | 316       |
| Pfizer/BioNTech | 1466          | 872         | 355              | 583       |
| Moderna         | 1103          | 646         | 236              | 457       |

Guillain-Barre syndrome (GBS):

| Manufacturer    | Overall OR | OR Women | OR Men | OR Men > 50 | OR Women > 50 |
|-----------------|------------|----------|--------|-------------|---------------|
| J&J             | 8.3        | 6.8      | 9.7    | 13.6        | 9.3           |
| Pfizer/BioNTech | 1.6        | 1.8      | 1.3    | 1.5         | 1.6           |
| Moderna         | 1.8        | 2.1      | 1.4    | 2           | 2.5           |

  

| Manufacturer    | Overall cases | Cases Women | Cases Men | Cases Men > 50 | Cases Women > 50 |
|-----------------|---------------|-------------|-----------|----------------|------------------|
| J & J           | 49            | 19          | 30        | 21             | 13               |
| Pfizer/BioNTech | 134           | 80          | 54        | 32             | 37               |
| Moderna         | 117           | 71          | 44        | 33             | 43               |

Myocarditis:

| Manufacturer    | Overall OR | OR Women | OR Men | OR Men < 25 |
|-----------------|------------|----------|--------|-------------|
| J & J           | 0.1        | 0.05     | 0.2    | 0           |
| Pfizer/BioNTech | 0.4        | 0.1      | 0.6    | 3.5         |
| Moderna         | 0.25       | 0.08     | 0.4    | 1.3         |

  

| Manufacturer    | Overall Cases | Cases Women | Cases Men | Cases Men < 25 |
|-----------------|---------------|-------------|-----------|----------------|
| J & J           | 9             | 2           | 7         | 0              |
| Pfizer/BioNTech | 480           | 96          | 382       | 264            |
| Moderna         | 247           | 40          | 206       | 93             |

# Pericarditis:

| Manufacturer    | Overall OR | OR Women | OR Men | OR Men < 25 |
|-----------------|------------|----------|--------|-------------|
| J & J           | 0.2        | 0.2      | 0.2    | 0.4         |
| Pfizer/BioNTech | 0.2        | 0.1      | 0.3    | 1.2         |
| Moderna         | 0.15       | 0.08     | 0.2    | 0.5         |

| Manufacturer    | Overall cases | Cases Women | Cases Men | Cases Men < 25 |
|-----------------|---------------|-------------|-----------|----------------|
| J & J           | 26            | 12          | 14        | 3              |
| Pfizer/BioNTech | 352           | 91          | 258       | 161            |
| Moderna         | 202           | 56          | 146       | 62             |

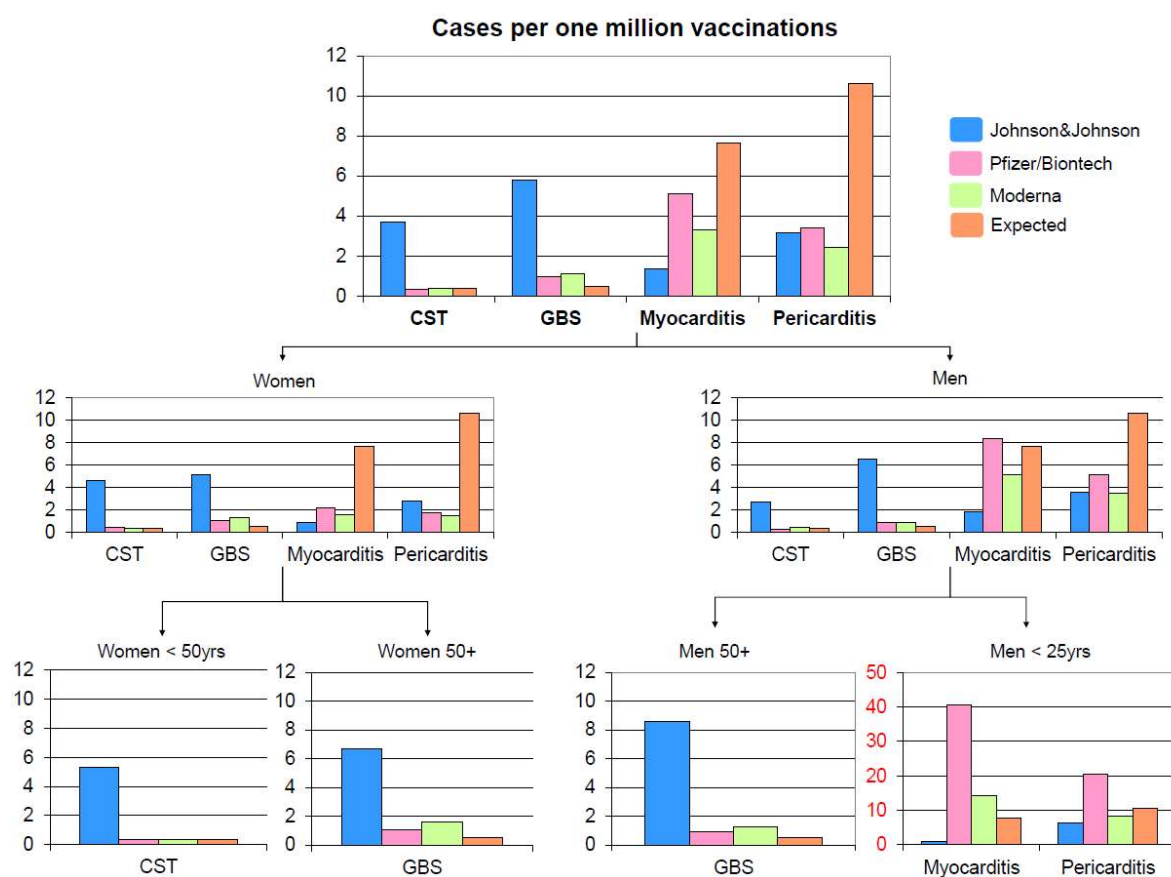

Supplemental Figure S1: Cases of cerebral venous sinus thrombosis (CST), Guillain-Barré-Syndrome (GBS), myocarditis and pericarditis per one million vaccinations: overview, women vs. men and age-dependent differences.
